# Supplementary material for: Quenching processes of aromatic hydrocarbons in the higher triplet excited states-energy transfer vs. electron transferElectronic supplementary information (ESI) available: The quenching of DBA(Tn) by CCl4, CHR(Tn) by NAP, the evidences of no DBA and CHR ions produced during two-color two-laser flash photolysis, and the evidence of formation of benzene/Cl complex. See http://www.rsc.org/suppdata/cp/b4/b400128a/
Source: Royal Society of Chemistry journal article supplement (doi:10.1039/b400128a), 2004-01-01
Supplement: esi.pdf [file esi.pdf]

Supporting information for:

# Quenching Processes of Aromatic Hydrocarbons in the Higher Triplet Excited States – Energy Transfer vs Electron Transfer

Xichen Cai, Masanori Sakamoto, Michihiro Hara, Sachiko Tojo, Kiyohiko Kawai, Masayuki Endo,  
Mamoru Fujitsuka, and Tetsuro Majima\*

The Institute of Scientific and Industrial Research (SANKEN), Osaka University, Mihogaoka 8-1,  
Ibaraki, Osaka 567-0047, Japan

\* The Institute of Scientific and Industrial Research (SANKEN), Osaka University, Mihogaoka 8-1,  
Ibaraki, Osaka 567-0047, Japan

Tel: +81-6-6879-8495, Fax: +81-6-6879-8499

[majima@sanken.osaka-u.ac.jp](mailto:majima@sanken.osaka-u.ac.jp)

**(1) The quenching of DBA( $T_n$ ) by  $CCl_4$ .**

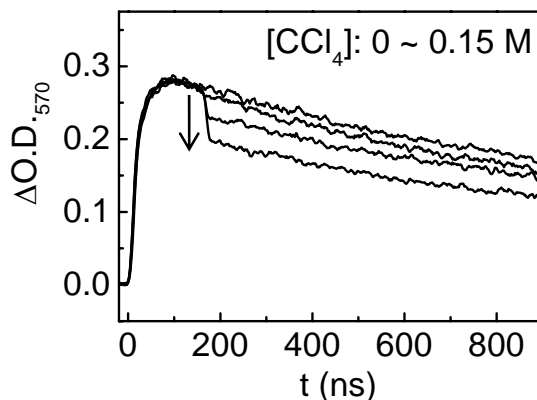

Fig. 1 Time profiles of the transient absorption of DBA( $T_1$ ) at 570 nm during two-color two-laser flash photolysis of DBA ( $3.6 \times 10^{-4}$  M) in the absence and presence of  $\text{CCl}_4$  (0.01, 0.08, and 0.15 M), in Ar-saturated acetonitrile solution. The growth of the transient absorption of DBA( $T_1$ ) in the time scale of few tens ns was due to the formation of DBA( $T_1$ ) through intersystem crossing from DBA( $S_1$ ).

## (2) The quenching of CHR( $T_n$ ) by NAP

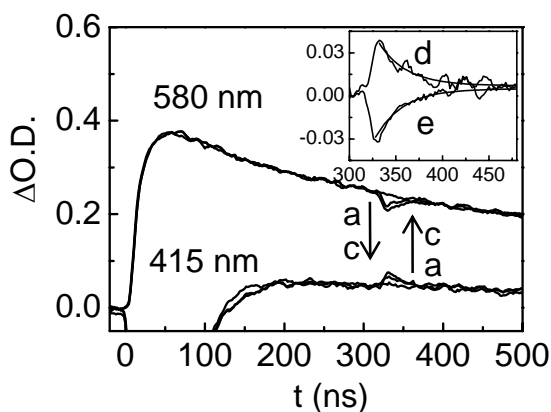

Fig. 2 Time profiles of the transient absorption at 580 and 415 nm during the two-color two-laser flash photolysis of CHR ( $3.0 \times 10^{-3}$  M) in the absence (a) and presence of NAP at 0.3 (b) and 0.7 (c) M in Ar-saturated acetonitrile solution. Inset shows the amplification of the growth and decay of NAP( $T_1$ ) at 415 nm (d) and the bleaching and recovery of CHR( $T_1$ ) at 580 nm (e) which were obtained by

subtraction of (a) from (c). The trace lines were obtained from fits to the pseudo-first-order reactions. The initial growth of the transient absorption of  $\text{CHR}(\text{T}_1)$  at 580 nm in the time scale of few tens ns corresponds to the intersystem crossing from  $\text{CHR}(\text{S}_1)$  to  $\text{CHR}(\text{T}_1)$ . The large minus signal of  $\Delta\text{O.D.}$  at 415 nm in the range of 100 ns is due to the fluorescence of  $\text{CHR}(\text{S}_1)$  with the lifetime of 40 ns.

### (3) The evidences for no formation of DBA and CHR radical cations produced during two-color two-laser flash photolysis.

$\text{DBA}^{\bullet+}$  and  $\text{CHR}^{\bullet+}$  can be observed from the two-photon ionization of DBA and CHR in the polar solvents. With the 355-nm laser irradiation of DBA and CHR in Ar-saturated acetonitrile solution at 50  $\text{mJ pulse}^{-1}$ , the two-photon ionization of DBA and CHR occurred to give  $\text{DBA}^{\bullet+}$  and  $\text{CHR}^{\bullet+}$ , respectively. The transient absorption spectra assigned to  $\text{DBA}^{\bullet+}$  and  $\text{CHR}^{\bullet+}$  were observed and similar to the reported results<sup>1</sup> (Figs. 3 and 4).

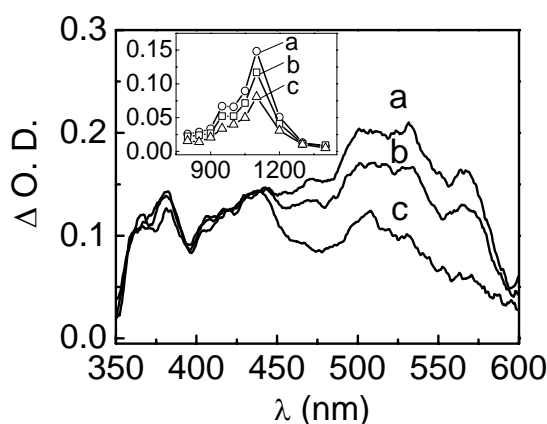

Fig. 3 Transient absorption spectra observed at (a) 0.5, (b) 1.0, and (c) 2.0  $\mu\text{s}$  after the 355-nm laser irradiation of DBA at 50  $\text{mJ pulse}^{-1}$  in Ar saturated acetonitrile solution. Inset shows the transient absorption spectra in the region of 800 – 1400 nm.

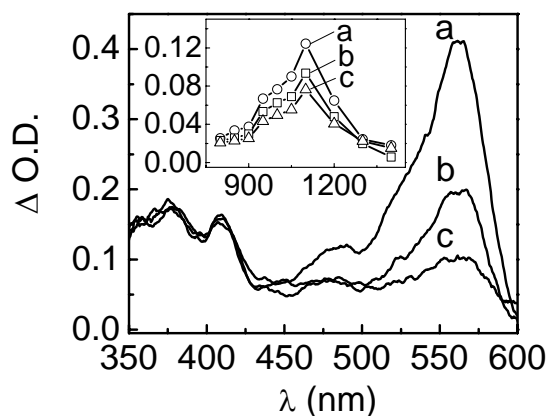

Fig. 4 Transient absorption spectra observed at (a) 0.5, (b) 1.0, and (c) 2.0  $\mu\text{s}$  after the 355-nm laser irradiation of CHR ( $3.0 \times 10^{-3}$  M) at  $50 \text{ mJ pulse}^{-1}$  in Ar-saturated acetonitrile solution. Inset shows the transient absorption spectra in the region of 800 – 1400 nm.

When 1,2-dichloroethane or  $\text{CH}_2\text{Cl}_2$  was used as Q and solvent in place of  $\text{CCl}_4$ , ELT was supposed to occur from  $\text{AH}(\text{T}_n)$  to Q. However, no change of transient absorptions of  $\text{DBA}(\text{T}_1)$  or  $\text{CHR}(\text{T}_1)$  was observed during the two-color two-laser flash photolysis (Figs. 5 and 6).

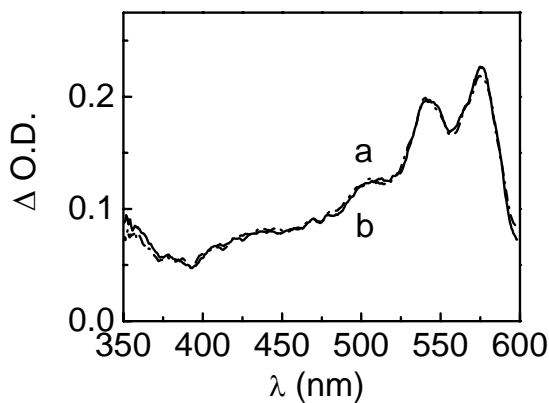

Fig. 5 Transient absorption spectra observed at 260 ns after the first 355-nm laser irradiation (a) (broken line), and at 100 ns after the second 532-nm laser irradiation during the two-color two-laser flash photolysis of DBA (b) (solid line) in Ar-saturated 1,2-dichloroethane solution.

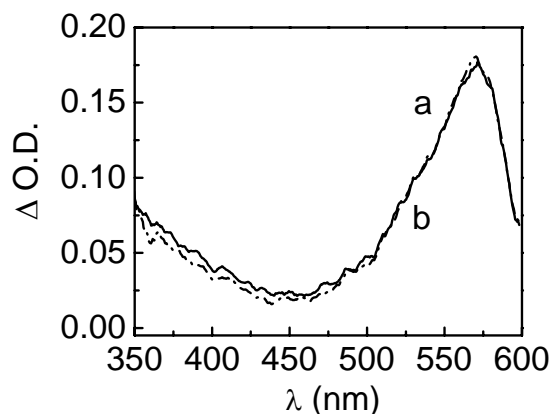

Fig. 6 Transient absorption spectra observed at 260 ns after the first 355-nm laser irradiation (a) (broken line), and at 100 ns after the second 532-nm laser irradiation during the two-color two-laser flash photolysis of CHR (b) (solid line) in Ar-saturated  $\text{CH}_2\text{Cl}_2$  solution.

Consequently, it is clearly evidenced that no ELT occurred from  $\text{NAP}(\text{T}_n)$ ,  $\text{DBA}(\text{T}_n)$ , or  $\text{CHR}(\text{T}_n)$  to Q.

**(4) The evidence for  $\text{AH}(\text{T}_n)$ -sensitized cleavage of C-Cl bond of  $\text{CCl}_4$  through TENT and the formation of benzene/Cl complex.**

When  $\text{CCl}_4$  was used as a Q of  $\text{NAP}(\text{T}_n)$ ,  $\text{DBA}(\text{T}_n)$ , and  $\text{CHR}(\text{T}_n)$ , the bleaching and no recovery of the transient absorptions of  $\text{AH}(\text{T}_1)$  were observed. Since neither  $\text{AH}^{\bullet+}$  nor  $\text{AH}^{\bullet-}$  was observed during the two-color two-laser flash photolysis of AH in the presence of  $\text{CCl}_4$ , the decomposition of C-Cl bond of  $\text{CCl}_4(\text{T}_1)$  occurred to give  $\bullet\text{CCl}_3$  and  $\bullet\text{Cl}$  radicals.<sup>2</sup> To confirm this decomposition mechanism, the two-color two-laser excitation experiment of NAP was performed in the presence of benzene with various [benzene] (0 - 2.0 M) in Ar-saturated  $\text{CCl}_4$ . In the absence of benzene, bleaching of the transient absorption at 490 nm was observed similarly to that at 415 nm. However, the bleaching of  $\Delta\text{O.D.}_{490}$

decreased with an increase of [benzene] (Fig. 7). No change of  $\Delta\text{O.D.}_{415}$  of  $\text{NAP}(\text{T}_1)$  was observed at various [benzene] in the solutions.

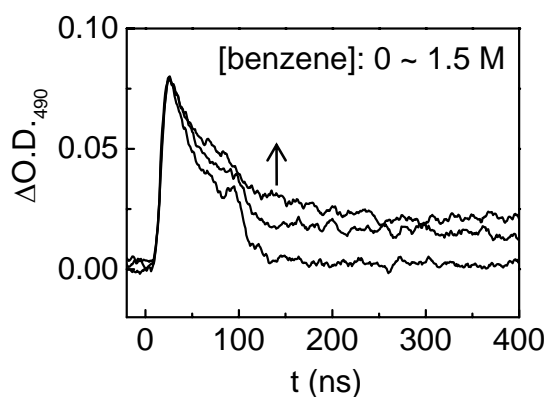

Fig. 7 Time profiles of  $\Delta\text{O.D.}_{490}$  during the two-color two-laser flash photolysis of a mixture of NAP and benzophenone as the triplet sensitizer in the absence and presence of benzene (1.0 and 1.5 M) in Ar-saturated  $\text{CCl}_4$  solution.

A benzene/Cl complex has been reported to have a peak around 500 nm.<sup>2,3</sup> Therefore, the results shown in Fig. 8 are interpreted by the formation of the benzene/Cl complex, indicating the  $\text{NAP}(\text{T}_n)$ -sensitized cleavage of the C-Cl bond in  $\text{CCl}_4(\text{T}_1)$ . Generation of  $\cdot\text{Cl}$  can be attributed to the TENT quenching not to the ELT quenching, because no change of  $\Delta\text{O.D.}_{415}$  of  $\text{NAP}(\text{T}_1)$  was observed during the two-color two-laser photolysis of NAP in 1,2-dichloroethane as a good electron acceptor in place of  $\text{CCl}_4$ . Similar  $\text{AH}(\text{T}_n)$ -sensitized scission of the C-Cl in  $\text{CCl}_4(\text{T}_1)$  was found to occur during the quenching of  $\text{DBA}(\text{T}_n)$  and  $\text{CHR}(\text{T}_n)$  by  $\text{CCl}_4$ .<sup>4,5</sup>

## References

- (1) T. Shida, Elsevier Science Publishers Inc.: Tokyo, 1988.
- (2) T. Gannon; W. G. McGimpsey. *J. Org. Chem.* 1993, **58**, 21, 5639.
- (3) N. Ichinose; T. Majima. *Chem. Phys. Lett.* 2000, **322**, 1-2, 15.
- (4) X. Cai; M. Hara; K. Kawai; S. Tojo; T. Majima. *Chem. Phys. Lett.* 2002, **368**, 3-4, 365.
- (5) X. Cai; M. Hara; K. Kawai; S. Tojo; M. Fujitsuka; T. Majima. *Tetrahedron Lett.* 2003, **44**, 32, 6117.
